# Supplementary material for: STAT4,TRAF3IP2,IL10, andHCP5Polymorphisms in Sjögren’s Syndrome: Association with Disease Susceptibility and Clinical Aspects
Source: Hindawi journal article supplement (doi:10.1155/2019/7682827), 2019-02-10
Supplement: f1 [file 7682827.f1.pdf]

**Table S1. Comparison of the haplotypes distribution between SS patients and controls**

| <b><i>TRAF3IP2/HCP5</i></b>                                                                    | <b>SS</b> | <b>Controls</b> | <b>Comparisons</b> | <b>P</b>     | <b>OR (CI 95%)</b> |
|------------------------------------------------------------------------------------------------|-----------|-----------------|--------------------|--------------|--------------------|
| CC                                                                                             | 319       | 329             | CC vs others       | <b>0.04</b>  | 0.67 (0.45-0.99)   |
| TC                                                                                             | 43        | 28              | TC vs others       | 0.08         | 1.54 (0.94-2.55)   |
| CA                                                                                             | 23        | 18              | CA vs others       | 0.48         | 1.25 (0.67-2.36)   |
| TA                                                                                             | 5         | 3               | TA vs others       | 0.38         | 1.62 (0.39-6.85)   |
| <b><i>IL10*</i></b>                                                                            | <b>SS</b> | <b>Controls</b> | <b>Comparisons</b> | <b>P</b>     | <b>OR (CI 95%)</b> |
| CC                                                                                             | 232       | 301             | CC vs others       | 0.35         | 1.14 (0.87-1.48)   |
| CA                                                                                             | 88        | 164             | CA vs others       | <b>0.006</b> | 0.65 (0.49-0.89)   |
| TC                                                                                             | 66        | 63              | TC vs others       | <b>0.027</b> | 1.52 (1.05-2.21)   |
| *The haplotypes correspond to the following order of SNPs: rs1800872 (C>T) and rs3024505 (C>A) |           |                 |                    |              |                    |

**Table S2. Complete list of genotype/phenotype correlation analyses**

|                        | <i>STAT4</i><br><i>RS7574865</i> |             | <i>HCP5</i><br><i>RS3099844</i> |             | <i>TRAF3IP2</i><br><i>rs33980500</i> |             | <i>IL10</i><br><i>rs1800872</i> |      | <i>IL10</i><br><i>rs3024505</i> |      |
|------------------------|----------------------------------|-------------|---------------------------------|-------------|--------------------------------------|-------------|---------------------------------|------|---------------------------------|------|
| Phenotype              | P                                | OR          | P                               | OR          | P                                    | OR          | P                               | OR   | P                               | OR   |
| Xerostomia             | 0.86                             | 0.92        | 0.46                            | 0.68        | 0.90                                 | 0.92        | 0.44                            | 1.60 | 0.58                            | 0.76 |
| Xerophthalmia          | 0.71                             | 0.80        | 0.40                            | 0.59        | 0.55                                 | 1.86        | 0.54                            | 1.53 | 0.71                            | 1.29 |
| Anti-Ro/SSA            | 0.43                             | 0.79        | <b>0.006</b>                    | <b>3.07</b> | 0.78                                 | 0.89        | 0.75                            | 1.12 | 0.36                            | 1.37 |
| Anti-La/SSB            | 0.93                             | 1.03        | <b>0.005</b>                    | <b>2.66</b> | <b>0.043</b>                         | <b>0.40</b> | 0.63                            | 0.85 | 0.83                            | 1.07 |
| Anti-nuclear (ANA)     | 0.44                             | 0.72        | 0.35                            | 1.69        | 0.35                                 | 2.01        | 0.95                            | 0.97 | 0.11                            | 2.42 |
| Rheumatoid factor      | 0.77                             | 1.09        | <b>0.028</b>                    | <b>2.17</b> | 0.14                                 | 1.87        | 0.07                            | 1.89 | 0.83                            | 0.93 |
| Hypergammaglobulinemia | 0.74                             | 1.11        | <b>0.007</b>                    | <b>2.54</b> | 0.82                                 | 0.90        | 0.67                            | 1.16 | 0.49                            | 0.79 |
| Cryoglobulinemia       | 0.17                             | 3.00        | 0.93                            | 1.08        | 0.87                                 | 0.83        | 0.22                            | 0.28 | 0.64                            | 1.41 |
| Monoclonal component   | <b>0.002</b>                     | <b>7.61</b> | 0.17                            | 2.11        | 0.31                                 | 0.36        | 0.83                            | 1.13 | 0.30                            | 0.51 |
| Hypocomplementemia     | 0.95                             | 0.97        | 0.27                            | 1.72        | 0.97                                 | 1.02        | 0.53                            | 0.68 | 0.41                            | 1.49 |
| Leucopenia             | <b>0.048</b>                     | <b>2.01</b> | <b>0.047</b>                    | <b>2.10</b> | 0.91                                 | 0.95        | 0.95                            | 0.97 | 0.96                            | 0.98 |
| Lymphopenia            | 0.23                             | 1.78        | 0.32                            | 1.70        | 0.30                                 | 0.45        | 0.55                            | 1.33 | 0.97                            | 1.02 |
| Neutropenia            | 0.92                             | 0.91        | 0.79                            | 1.36        | 0.36                                 | 0.83        | 0.54                            | 1.84 | 0.79                            | 0.71 |
| Lymphoma               | 0.53                             | 0.78        | <b>0.002</b>                    | <b>7.23</b> | 0.78                                 | 0.74        | 0.85                            | 0.85 | 0.30                            | 2.02 |
| Glandular swelling     | 0.80                             | 0.91        | 0.42                            | 1.15        | 0.34                                 | 1.55        | 0.65                            | 0.82 | 0.95                            | 1.02 |
| Arthritis              | 0.21                             | 1.77        | 0.36                            | 1.56        | 0.62                                 | 1.34        | 0.97                            | 0.98 | 0.93                            | 1.04 |

Significant associations are reported in bold.
